# Supplementary material
Source: MDPI journal article supplement (https://www.mdpi.com/2071-1050/14/23/16049)
Supplement: s1 [file sustainability-2002888-supplementary.pdf › sustainability-2002888-supplementary.pdf]

# Treatment of High Nutrient-Loaded Wastewater in a Constructed Floating Wetland with Different Configurations: Role of *Lantana* Biochar Addition

Preeti Parihar<sup>1</sup>, Naveen Chand<sup>2</sup>, Surindra Suthar<sup>1,\*</sup>

<sup>1</sup>*School of Environment & Natural Resources, Doon University, Dehradun-248001, India*

<sup>2</sup>*Environmental Engineering Research Group, National Institute of Technology Delhi, New Delhi-110040, India*

\* Correspondence: suthariitd@gmail.com

## Supplementary Files

**Table S1** – Biochar characterization (mean  $\pm$  SD, n = 3) used for experimentations

| Parameters                        | Values           |
|-----------------------------------|------------------|
| Char yield (%)                    | 61.32 $\pm$ 1.05 |
| Bulk density (g/cm <sup>3</sup> ) | 0.53 $\pm$ 0.012 |
| Moisture content (%)              | 0.36 $\pm$ 0.01  |
| Volatile matter (%)               | 2.28 $\pm$ 0.01  |
| Ash content (%)                   | 3.85 $\pm$ 0.02  |
| Fixed carbon content (%)          | 93.51 $\pm$ 1.30 |
| C (%)                             | 67.59 $\pm$ 0.52 |
| H (%)                             | 7.03 $\pm$ 0.12  |
| N (%)                             | 16.85 $\pm$ 1.42 |
| O (%)                             | 8.53 $\pm$ 0.65  |
| P (%)                             | 0.45 $\pm$ 0.12  |
| K (%)                             | 2.88 $\pm$ 0.76  |
